# Supplementary material for: Controlled poling of a fully printed piezoelectric PVDF-TrFE device as a multifunctional platform with inkjet-printed silver electrodes
Source: Royal Society of Chemistry journal article supplement (doi:10.1039/d2tc01913b), 2022-01-01
Supplement: d2tc01913b1.pdf [file d2tc01913b1.pdf]

## Supporting Information

### Controlled poling of fully printed piezoelectric PVDF-TrFE device multifunctional platform with inkjet printed silver electrodes

Marc Alique,<sup>a†</sup> Ana Moya,<sup>a</sup> Martin Kreuzer,<sup>c</sup> Paul Lacharmoise,<sup>a</sup> Gonzalo Murillo<sup>b</sup>, Claudia Delgado Simao<sup>a\*</sup>

**Table S1.** Jetting parameters of the different inks.

|                                | Ag ANP | Ag Inktec                      | Ag PVN                         | Au               |
|--------------------------------|--------|--------------------------------|--------------------------------|------------------|
| Platen temperature [°C]        | 40     | -                              | -                              | -                |
| Cartridge temperature [°C]     | 35     | 38                             | 39                             | 30               |
| Jetting frequency [kHz]        | 5      | 3                              | 5                              | 5                |
| Meniscus Setpoint              | 5.0    | 2.0                            | 5.0                            | 5.0              |
| Initial cleaning               | None   | SplitPurgueSplit               | SplitPurgueSplit               | SplitPurgueSplit |
| Printing cleaning              | None   | SplitPurgueSplit<br>(50 Bands) | SplitPurgueSplit<br>(70 Bands) | None             |
| $\Delta V$ [V]                 | 30     | 40                             | 30                             | 30               |
| Drop spacing [ $\mu\text{m}$ ] | 40     | 35                             | 40                             | 15               |
| $\Delta t_1$ [ $\mu\text{s}$ ] | 2.560  | 2.816                          | 2.560                          | 2.560            |
| $\Delta t_2$ [ $\mu\text{s}$ ] | 2.560  | 3.712                          | 2.560                          | 2.560            |
| $\Delta t_3$ [ $\mu\text{s}$ ] | 2.560  | 3.392                          | 2.560                          | 2.560            |
| $\Delta t_4$ [ $\mu\text{s}$ ] | -      | 0.832                          | -                              | -                |
| Level $V_1$                    | 7 %    | 20 %                           | 7 %                            | 7 %              |
| Level $V_2$                    | 100 %  | 100 %                          | 100 %                          | 100 %            |
| Level $V_3$                    | 27 %   | 67 %                           | 27 %                           | 100 %            |
| Level $V_4$                    | -      | 40 %                           | -                              | -                |
| Slew rate 1                    | 1.00   | 0.65                           | 1.00                           | 1.00             |
| Slew rate 2                    | 1.00   | 0.93                           | 1.00                           | 1.00             |
| Slew rate 3                    | 1.00   | 0.60                           | 1.00                           | 1.00             |
| Slew rate 4                    | -      | 0.80                           | -                              | -                |

**Drop spacing selection and morphology for the bottom electrode**

After establishing the proper parameters of the ink ejection in the inkjet printer (Table S1) different lines were printed at different DS (Figure S1). The DS represents the center-to-center distance between the printed droplets from 5 to 75  $\mu\text{m}$ , increasing 5  $\mu\text{m}$  each, to check which is the one that presents a continuous line with the lower amount of ink. Then, to know the thickness of the continuous lines printed at each DS a profilometric analysis has been done. The images of the pattern of each ink and the profile of the continuous lines are shown in the Table S2. As can be seen, each ink presents different pattern in the PET surface, therefore the DS selected will be correlated with the different properties of the inks. Also, in Figures S1 and S2, can be observed that ANP and PVN Ag inks have bigger thickness in comparison with the Ag Inktec or the Au ink and it can be attributed to the wettability properties of the ink in the substrate, because the ones that wet less have a worst distribution of the, pilling up at one point instead of being homogeneously distributed. Analyzing all of this features, the DSs selected are: 40  $\mu\text{m}$ , 40  $\mu\text{m}$ , 35  $\mu\text{m}$  and 20  $\mu\text{m}$  for the ANP, PVN, Inktec and Au inks respectively.

**Table S2.** Drop spacing pattern of the different inks

| Design                    | PVN                                                                                 | ANP                                                                                 | Inktec                                                                               | Au                                                                                    |
|---------------------------|-------------------------------------------------------------------------------------|-------------------------------------------------------------------------------------|--------------------------------------------------------------------------------------|---------------------------------------------------------------------------------------|
| ..... DS 75 $\mu\text{m}$ | 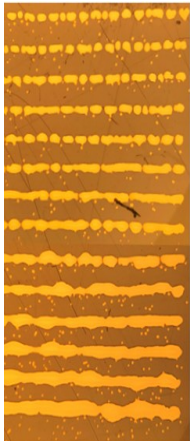 |  |  |  |
| ..... DS 70 $\mu\text{m}$ |                                                                                     |                                                                                     |                                                                                      |                                                                                       |
| ..... DS 65 $\mu\text{m}$ |                                                                                     |                                                                                     |                                                                                      |                                                                                       |
| ..... DS 60 $\mu\text{m}$ |                                                                                     |                                                                                     |                                                                                      |                                                                                       |
| ..... DS 55 $\mu\text{m}$ |                                                                                     |                                                                                     |                                                                                      |                                                                                       |
| ..... DS 50 $\mu\text{m}$ |                                                                                     |                                                                                     |                                                                                      |                                                                                       |
| ..... DS 45 $\mu\text{m}$ |                                                                                     |                                                                                     |                                                                                      |                                                                                       |
| ..... DS 40 $\mu\text{m}$ |                                                                                     |                                                                                     |                                                                                      |                                                                                       |
| ..... DS 35 $\mu\text{m}$ |                                                                                     |                                                                                     |                                                                                      |                                                                                       |
| ..... DS 30 $\mu\text{m}$ |                                                                                     |                                                                                     |                                                                                      |                                                                                       |
| ..... DS 25 $\mu\text{m}$ |                                                                                     |                                                                                     |                                                                                      |                                                                                       |
| ..... DS 20 $\mu\text{m}$ |                                                                                     |                                                                                     |                                                                                      |                                                                                       |
| ..... DS 15 $\mu\text{m}$ |                                                                                     |                                                                                     |                                                                                      |                                                                                       |
| ..... DS 10 $\mu\text{m}$ |                                                                                     |                                                                                     |                                                                                      |                                                                                       |
| ..... DS 5 $\mu\text{m}$  |                                                                                     |                                                                                     |                                                                                      |                                                                                       |
|                           | 40                                                                                  | 40                                                                                  | 35                                                                                   | 35                                                                                    |

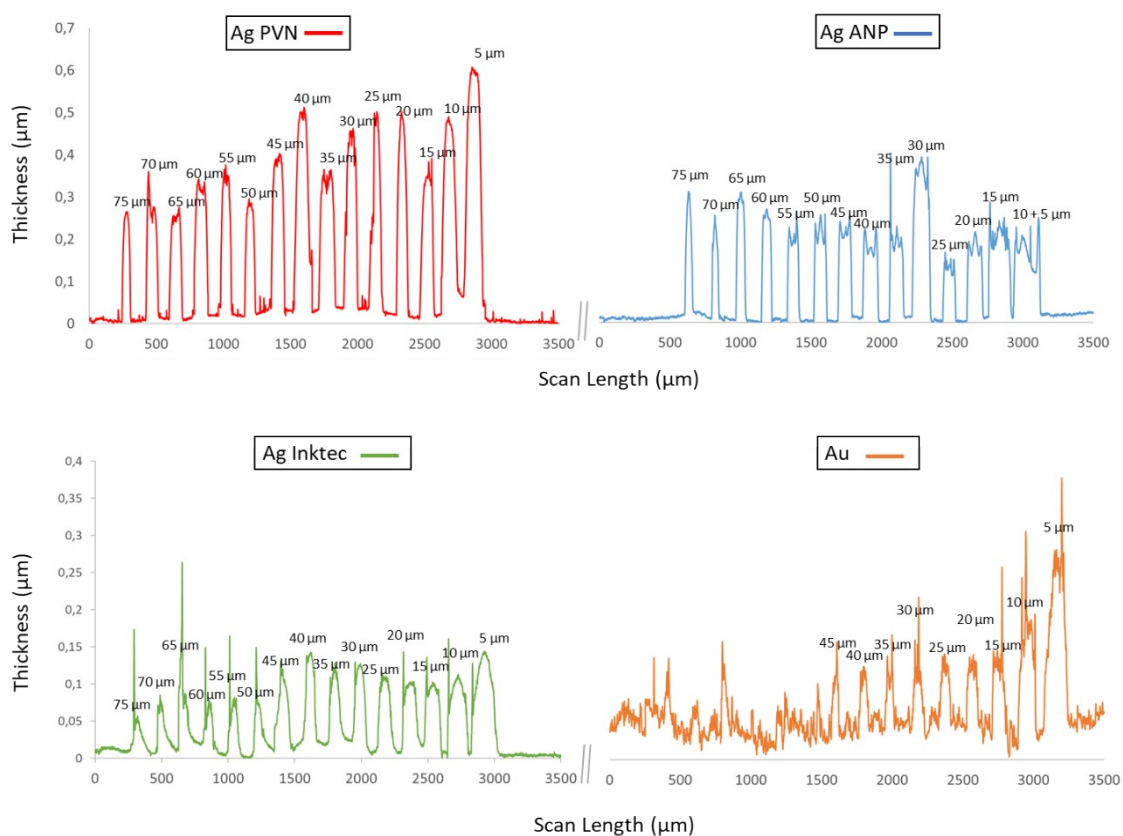

**Figure S1.** Profilometric analysis of the printed lines at different drop spacing

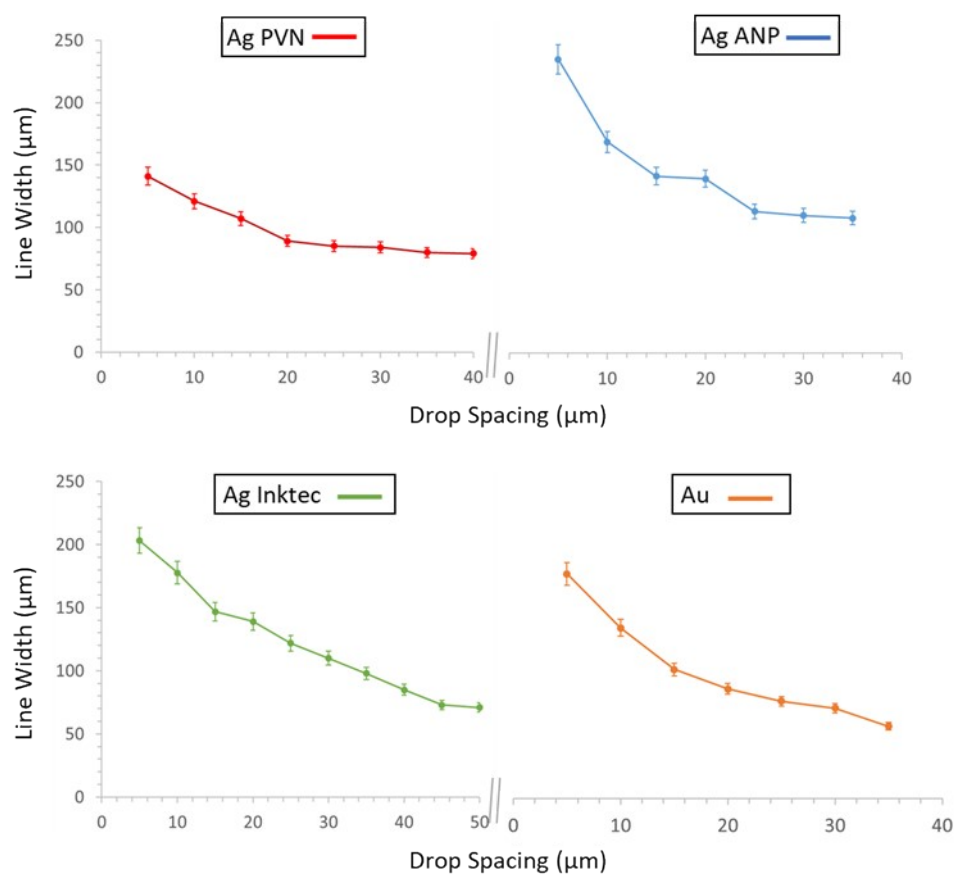

**Figure S2.** Line width of each line printed at different drop spacing (n=3)

**Table S3.** SEM images of the different inks surface layers.

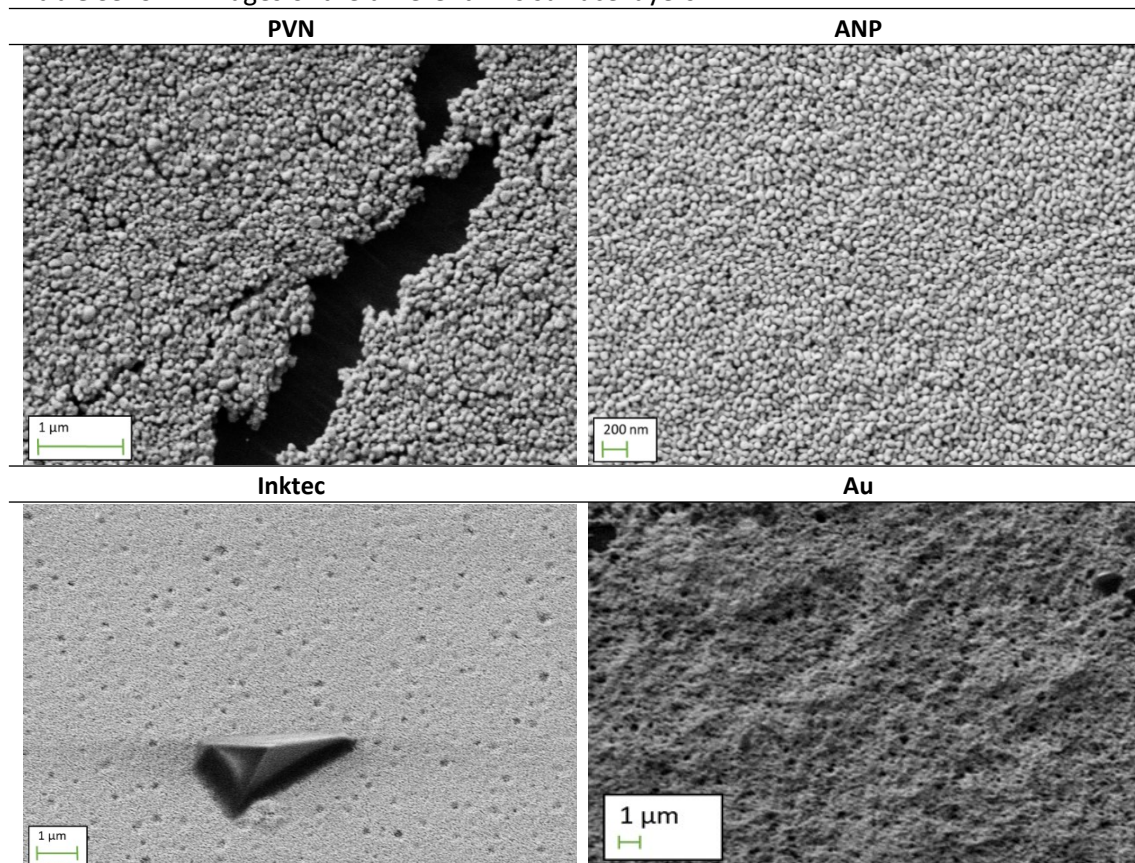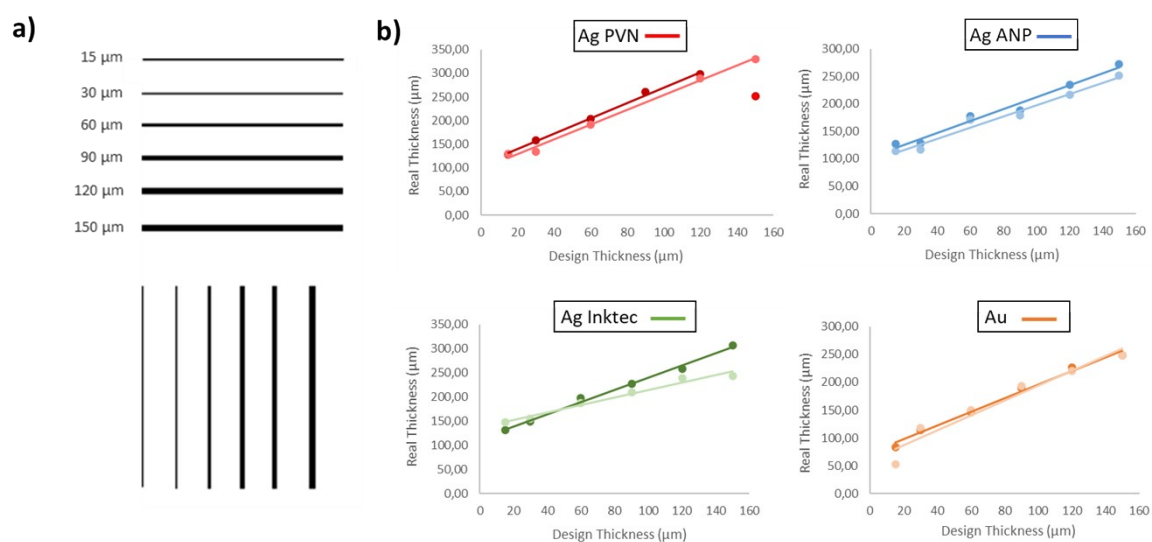

**Figure S3.** a) Line pattern printed to know the resolution of each ink. b) Representation of the line width in vertical and horizontal lines.

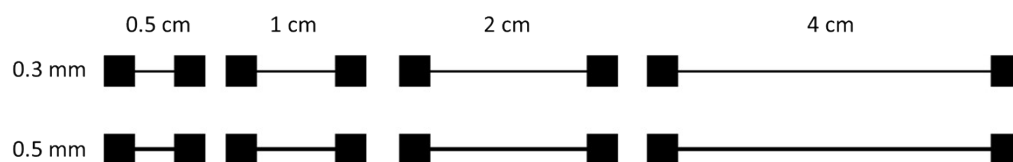

**Figure S4.** Line pattern designed to characterize the electrical parameters of the inks

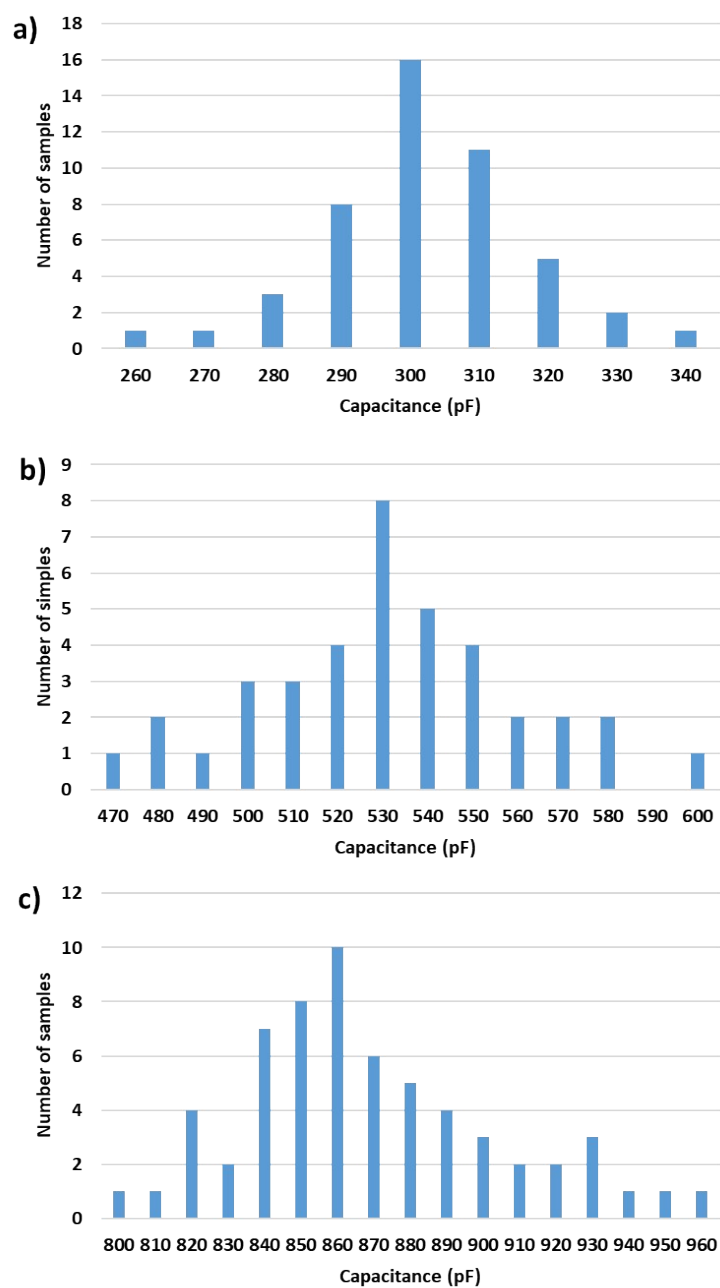

**Figure S5.** Gaussian distribution of the printed piezoelectric samples for the a) 3x3, b) 4x4) and c) 5x5 mm<sup>2</sup> printed electrodes area.

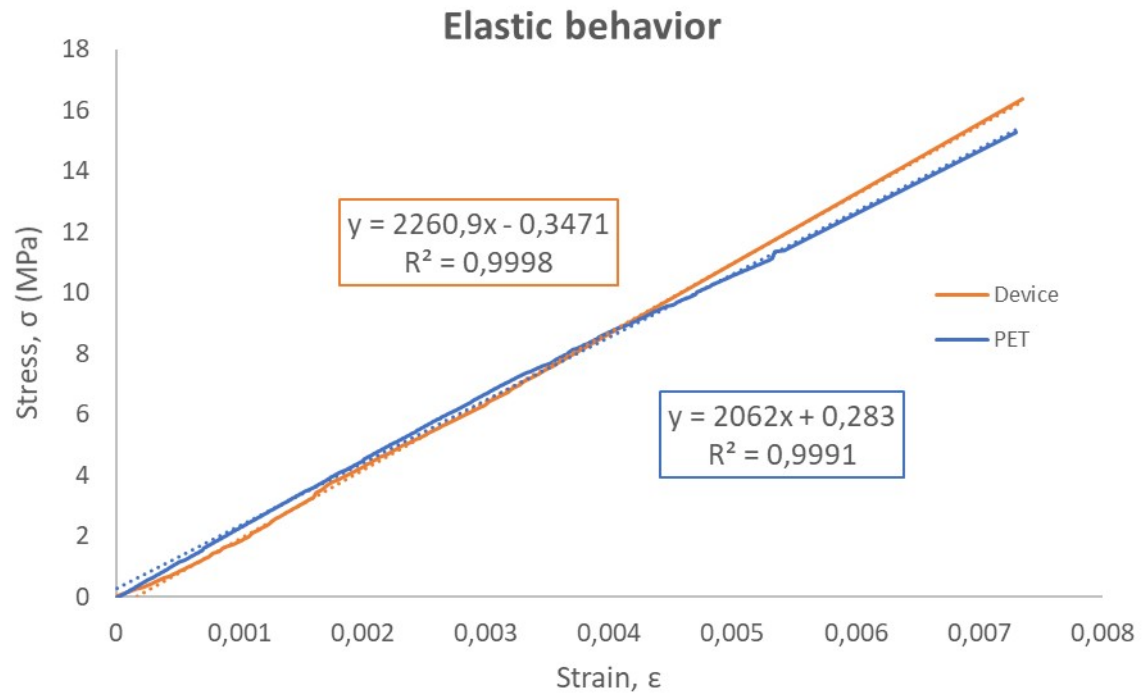

**Figure S6.** Elastic behavior of the stress-strain diagram to calculate the Young's modulus.
